# Supplementary material for: Falls in people with multiple sclerosis: experiences of 115 fall situations
Source: PubMed Central journal article supplement — Clin Rehabil. 2017 Sep 13;32(4):526–35. doi: 10.1177/0269215517730597 (PMC5865469; doi:10.1177/0269215517730597), 2017-09-13
Supplement: cre-2017-6170-File003.pdf [file cre-2017-6170-File003.pdf]

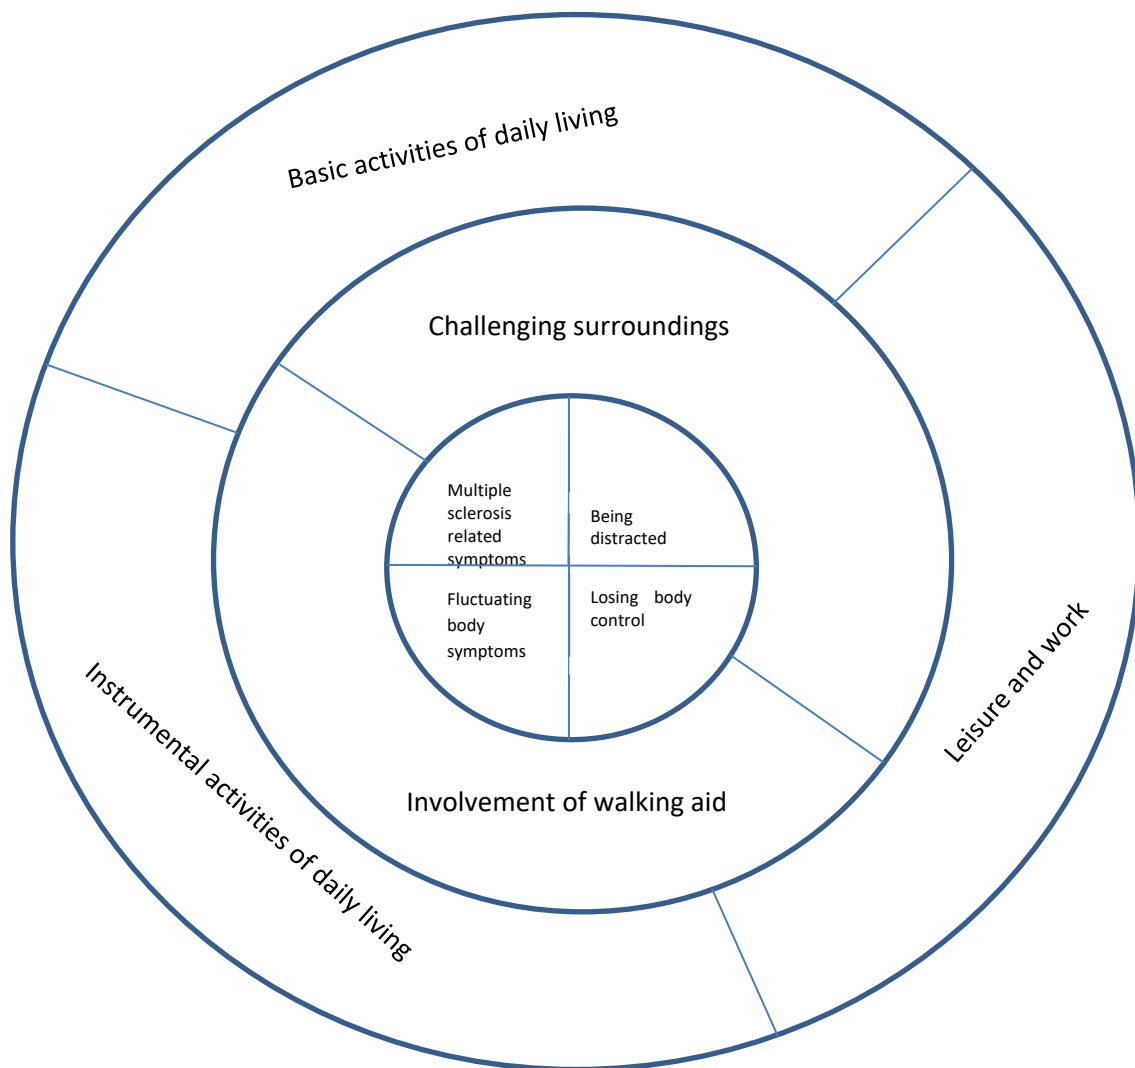

Figure 1. Schematic overview over categories and subcategories. The falls occurs during activities (outer circle), and are affected by both intrinsic (inner circle) and extrinsic (middle circle) factors.
